# Supplementary material
Source: ML conference proceedings conference paper supplement (https://proceedings.neurips.cc/paper_files/paper/2007/hash/8fe0093bb30d6f8c31474bd0764e6ac0-Abstract.html)
Supplement: Supplementary file 1 [file 8fe0093bb30d6f8c31474bd0764e6ac0-Supplemental.zip]

Poster ID: W62

Paper ID: 416

# Simplified Rules and Theoretical Analysis for Information Bottleneck Optimization and PCA with Spiking Neurons

Lars Buesing, Wolfgang Maass

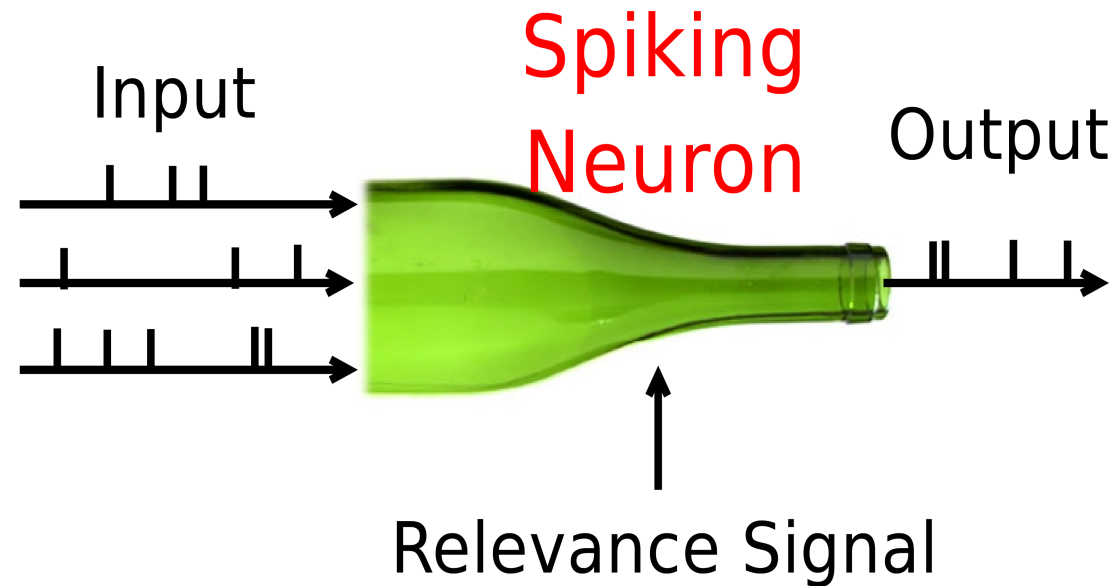

- Info Bottleneck optimization via synaptic plasticity
- Convergence analysis
- Link to PCA
